# Supplementary material for: K-mer clustering algorithm using a MapReduce framework: application to the parallelization of the Inchworm module of Trinity
Source: PubMed Central journal article supplement (PMC5670514; doi:10.1186/s12859-017-1881-8), 2017-11-03
Supplement: 12859_2017_1881_MOESM1_ESM.pdf [file 12859_2017_1881_MOESM1_ESM.pdf]

**K-mer clustering algorithm using MapReduce frame:  
application to the parallelization of Inchworm module of  
Trinity**

Chang Sik Kim<sup>1,†</sup>, Martyn D. Winn<sup>1\*</sup>, Vipin Sachdeva<sup>2</sup> and Kirk E. Jordan<sup>2</sup>

<sup>1</sup>The Hartree Centre, STFC Daresbury Laboratory, Warrington, WA4 4AD, UK

<sup>2</sup>Computational Science Center, IBM T.J. Watson Research, Cambridge, MA USA

<sup>†</sup>Cancer Research UK Manchester Institute, The University of Manchester, Manchester,  
M20 4BX, UK

<sup>§</sup>Silicon Therapeutics, 300 A Street, Boston MA, USA

<sup>†,§</sup>Present address

\*Corresponding author: [martyn.winn@stfc.ac.uk](mailto:martyn.winn@stfc.ac.uk)

## Supplementary Methods

**Algorithm 1:** MR-step1 for extracting all unique k-mers and its abundant value. Note edge represents the pair of k-mers appearing consecutively in RNA-seq read;  $V_i$  represents the  $i$ th k-mer node;  $E_{ij}$  represents the pair of k-mers consecutively appearing on input reads;  $C_i$  represents the number of times k-mer <sub>$i$</sub>  found from all input reads;  $CE_{ij}$  represents the number of times  $E_{ij}$  found from all input reads.

---

|                   |                                                                                                                                                                                                                                                                                                                                                                                                                                                                          |
|-------------------|--------------------------------------------------------------------------------------------------------------------------------------------------------------------------------------------------------------------------------------------------------------------------------------------------------------------------------------------------------------------------------------------------------------------------------------------------------------------------|
| <b>Input:</b>     | 1. MapReduce object $V$ for storing k-mers<br>2. RNA-Seq input reads                                                                                                                                                                                                                                                                                                                                                                                                     |
| <b>Algorithm:</b> | 1. Map $V$ : convert RNA-seq reads to k-mers<br>Input: Key = <i>null</i> , Value = <i>null</i><br>i) Extract all k-mers from RNA-Seq reads<br>ii) Convert k-mer into 64 bit unsigned integer as $V_i$<br>Output: Key = $V_i$ , Value = $V_i$<br><br>2. Collate $V$ : k-mer as key<br><br>3. Reduce $V$ : emit all unique k-mers<br>Input: Key = $V_i$ , MultiValue = $V_1, V_2, \dots, V_{C_i}$<br>$C_i$ = the size of MultiValue<br>Output: Key = $V_i$ , Value = $C_i$ |
| <b>Output:</b>    | 1. MapReduce object $V$ : Key = $V_i$ , Value = $C_i$                                                                                                                                                                                                                                                                                                                                                                                                                    |

---

**Algorithm 2:** MR-step2 for extracting all unique edges and its abundant value. See Algorithm 1 for the description of symbols in this algorithm.

---

|                   |                                                                                                                                                                                                                                                                                                                                                                                                                                                                                                                                       |
|-------------------|---------------------------------------------------------------------------------------------------------------------------------------------------------------------------------------------------------------------------------------------------------------------------------------------------------------------------------------------------------------------------------------------------------------------------------------------------------------------------------------------------------------------------------------|
| <b>Input:</b>     | 1. MapReduce object $E$ for storing edges<br>2. RNA-Seq input reads                                                                                                                                                                                                                                                                                                                                                                                                                                                                   |
| <b>Algorithm:</b> | 1. Map $E$ : convert RNA-seq reads to edges<br>Input: Key = $null$ , Value = $null$<br>i) Extract all pairs of k-mers as edges from RNA-Seq reads<br>ii) Convert pairs of k-mers into $(V_i, V_j)$<br>Output: Key = $E_{i,j} = (V_i, V_j)$ , Value = $E_{i,j}$<br><br>2. Collate $E$ : edge as key<br><br>3. Reduce $E$ : emit all unique edges<br>Input: Key = $E_{i,j}$ , MultiValue = $E_{i,j}, E_{i,j}, \dots, E_{i,j}$<br>$CE_{i,j}$ = the size of MultiValue<br>Output: Key = $E_{i,j} = (V_i, V_j, CE_{i,j})$ , Value = $null$ |
| <b>Output:</b>    | 1. MapReduce object $E$ : Key = $E_{i,j}$ , Value = $null$                                                                                                                                                                                                                                                                                                                                                                                                                                                                            |

---

**Algorithm 3:** MR-step3 for edge filtering. See Algorithm1 for the description of symbols in this algorithm.

---

**Input:** 1. MapReduce object  $E$ : Key =  $E_{ij} = (V_i, V_j)$ , Value =  $null$

**Algorithm:** 1. Map  $E$ : convert edges to k-mer/edge pairs

Input: Key =  $E_{ij} = (V_i, V_j)$ , Value =  $null$

If *direction = right*:

Output: Key =  $V_i$ , Value =  $E_{ij}$

Else

Output: Key =  $V_j$ , Value =  $E_{ij}$

2. Collate  $V$ : k-mer node as key

3. Reduce  $E$ : emit the filtered edge assignment

Input: Key =  $V_i$  or  $V_j$ , MultiValue =  $E_{ij}, E_{ij}, \dots$

$CE_{max} = \max(CE, CE, \dots)$

If  $CE_i = CE_{max}$  for each  $E_i$  in MultiValue:

Output: Key =  $E_{ij} = (V_i, V_j)$ , Value =  $null$

---

**Output:** 1. MapReduce object  $E$ : Key =  $E_{ij}$ , Value =  $null$

---

**Algorithm 4:** MR-step4 for connected component labelling. See Algorithm 1 for the description of symbols in this algorithm.

---

|                   |                                                                                                                                                                                                                                                                                                                                                                                                                                                                                                                                                                                                                                                                                                                                                                                                                                                                                                                                                                                                                                                                                                                                                                                                                                                                                                                                                                                                                                                                                                                                                                                                                                                                                                                                                                                                                                                                                                                                                                                                                                                                                                                                                                                                                                                                                                                                                                                                                                                |
|-------------------|------------------------------------------------------------------------------------------------------------------------------------------------------------------------------------------------------------------------------------------------------------------------------------------------------------------------------------------------------------------------------------------------------------------------------------------------------------------------------------------------------------------------------------------------------------------------------------------------------------------------------------------------------------------------------------------------------------------------------------------------------------------------------------------------------------------------------------------------------------------------------------------------------------------------------------------------------------------------------------------------------------------------------------------------------------------------------------------------------------------------------------------------------------------------------------------------------------------------------------------------------------------------------------------------------------------------------------------------------------------------------------------------------------------------------------------------------------------------------------------------------------------------------------------------------------------------------------------------------------------------------------------------------------------------------------------------------------------------------------------------------------------------------------------------------------------------------------------------------------------------------------------------------------------------------------------------------------------------------------------------------------------------------------------------------------------------------------------------------------------------------------------------------------------------------------------------------------------------------------------------------------------------------------------------------------------------------------------------------------------------------------------------------------------------------------------------|
| <b>Input:</b>     | <ol style="list-style-type: none"> <li>1. MapReduce object <math>E</math>: Key = <math>E_{i,j} = (V_i, V_j)</math>, Value = <math>null</math></li> <li>2. MapReduce object <math>V</math>: Key = <math>V_i</math>, Value = <math>Z_i = V_i</math></li> <li>3. MapReduce object <math>W</math> = empty workspace</li> </ol>                                                                                                                                                                                                                                                                                                                                                                                                                                                                                                                                                                                                                                                                                                                                                                                                                                                                                                                                                                                                                                                                                                                                                                                                                                                                                                                                                                                                                                                                                                                                                                                                                                                                                                                                                                                                                                                                                                                                                                                                                                                                                                                     |
| <b>Algorithm:</b> | <ol style="list-style-type: none"> <li>1. Map <math>W</math> using <math>E</math> as input: convert edges to k-mer nodes <ul style="list-style-type: none"> <li>Input: Key = <math>E_{i,j} = (V_i, V_j)</math>, Value = <math>null</math></li> <li>Output: Key = <math>V_i</math>, Value = <math>E_{i,j} = (V_i, V_j)</math></li> <li>Output: Key = <math>V_j</math>, Value = <math>E_{i,j} = (V_i, V_j)</math></li> <li>Add <math>V</math> to <math>W</math></li> <li>Collate <math>W</math>: <math>V</math> as key</li> <li>Reduce <math>W</math>: emit edges with zone ID of k-mer node <ul style="list-style-type: none"> <li>Input: Key = <math>V_i</math>, MultiValue = <math>EEEE...Z</math> for each <math>E</math> in <i>MultiValue</i></li> <li>Output: Key = <math>E_{i,j}</math>, Value = <math>Z_i</math></li> </ul> </li> </ul> </li> <li>2. Collate <math>W</math>: Edge as key <ul style="list-style-type: none"> <li>Reduce <math>W</math>: emit zone ID reassignment <ul style="list-style-type: none"> <li>Input: Key = <math>E_{i,j}</math>, Value = <math>Z_i Z_j</math></li> <li><math>Z_{winner} = \min(Z_i, Z_j)</math>; <math>Z_{loser} = \max(Z_i, Z_j)</math></li> <li>If <math>Z_i</math> and <math>Z_j</math> are different: <ul style="list-style-type: none"> <li>Output: Key = <math>Z_{loser}</math>, Value = <math>Z_{winner}</math></li> </ul> </li> </ul> </li> <li>Exit: if <math>W</math> is empty</li> </ul> </li> <li>3. Map <math>V</math>: Invert k-mer node/zone ID pair <ul style="list-style-type: none"> <li>Input: Key = <math>V_i</math>, Value = <math>Z_i</math></li> <li>Output: Key = <math>Z_i</math>, Value = <math>V_i</math></li> </ul> </li> <li>4. Map <math>V</math> using <math>W</math> as input: add zone ID assignments into <math>W</math> to <math>V</math> <ul style="list-style-type: none"> <li>Output: Key = <math>Z_i</math>, Value = <math>Z_{winner}</math></li> <li>Collate <math>V</math>: zone ID as key</li> <li>Reduce <math>V</math>: emit new zone ID assignment of each k-mer node <ul style="list-style-type: none"> <li>Input: Key = <math>Z_i</math>, MultiValue = <math>VVVV...ZZZ...</math></li> <li><math>Z_{new} = \min(Z_i, Z_j, Z_k, ...)</math></li> <li>For each <math>V_i</math> in MultiValue: <ul style="list-style-type: none"> <li>Output: Key = <math>V_i</math>, Value = <math>Z_{new}</math></li> </ul> </li> </ul> </li> </ul> </li> </ol> |
| <b>Output:</b>    | <ol style="list-style-type: none"> <li>1. MapReduce object <math>V</math>: Key = <math>V_i</math>, Value = <math>Z_i</math></li> </ol>                                                                                                                                                                                                                                                                                                                                                                                                                                                                                                                                                                                                                                                                                                                                                                                                                                                                                                                                                                                                                                                                                                                                                                                                                                                                                                                                                                                                                                                                                                                                                                                                                                                                                                                                                                                                                                                                                                                                                                                                                                                                                                                                                                                                                                                                                                         |

---

**Algorithm 5:** MR-step5 for construction of *inchworm* contigs. See Algorithm 1 for the description of symbols in this algorithm.

---

**Input:** 1. MapReduce object  $V_i$ : Key =  $V_i$ , Value =  $Z_i$   
2. MapReduce object  $K_i$ : Key =  $V_i$ , Value =  $C_i$

**Algorithm:** 1. Add  $V$  to  $K$   
2. Collate  $K$ : k-mer node as key  
3. Reduce  $K$ : emit zone ID with its k-mers and count values  
    Input: Key =  $V_i$ , MultiValue =  $Z_i, C_i$   
    Create *hash\_map* table: Key =  $V_i$ , Value =  $C_i$   
    Sort *hash\_map* table by  $C_i$  in descending order  
    Execute *inchworm* with *hash\_map* table as input

**Output:** 1. *inchworm* contigs: assembled sequences in fasta format

---
